# Supplementary material
Source: MDPI journal article supplement (https://www.mdpi.com/2076-0760/6/4/122)
Supplement: s1 [file s1]

**Table S2** Death rate models for the N-S transect, showing up to the 5 most important terms for both the whole period model (left) and the split period model (right). Each model shows the term (left), multiplier (middle) and ERR contribution (right). The  $\Sigma$ ERR row shows the number of terms in the complete model (left) and the total ERR value for the full model (right)

| Whole period             |                   |             |            | Split period        |             |            |                  |             |            |
|--------------------------|-------------------|-------------|------------|---------------------|-------------|------------|------------------|-------------|------------|
| Country                  | 1960-2014         |             |            | 1960-1989           |             |            | 1990-2014        |             |            |
| Libya*                   | u7(t- 2)          | 1.0157e+00  | 98.027     | u4(t- 1) * u4(t- 1) | 5.5825e-01  | 9.9110e+01 | No Model         |             |            |
|                          | u2(t- 2)*u7(t- 2) | -1.1178e-02 | 1.3465     | u3(t- 1) * u3(t- 2) | -1.8372e-08 | 7.7699e-01 |                  |             |            |
|                          | u9(t- 3)*u9(t- 5) | 1.9791e-04  | 0.31385    | u5(t- 5) * u8(t- 3) | 6.4723e-02  | 5.7764e-02 |                  |             |            |
|                          | u5(t- 2)*u5(t- 5) | -3.5891e-03 | 0.19030    | u3(t- 3) * u7(t- 5) | -6.2068e-06 | 3.2259e-02 |                  |             |            |
|                          | u7(t- 1)*u7(t-4)  | 2.3523e-03  | 0.024071   |                     |             |            |                  |             |            |
| $\Sigma$ ERR             | 5                 |             | 99.90      | 4                   |             | 99.77      |                  |             |            |
| Chad                     | u5(t-5)           | 2.1993e+00  | 9.9312e+01 | u4(t-5)*u5(t-4)     | 4.4731e-01  | 9.9858e+01 | u5(t-1)          | 2.8947e+00  | 9.9673e+01 |
|                          | u5(t-5)*u8(t-5)   | 1.1854e-01  | 3.2136e-01 | u4(t-2)*u5(t-2)     | 3.4934e-01  | 8.0844e-02 | u1(t-1)*u5(t-1)  | -1.9186e-02 | 1.5936e-01 |
|                          | u5(t- 1)          | 8.8321e-01  | 2.1784e-01 | u1(t-1)*u3(t-5)     | 2.0921e-04  | 3.7795e-02 | u1(t-1)*u10(t-5) | 1.9594e-02  | 1.6294e-01 |
|                          | u5(t-5)*u5(t-5)   | -6.9804e-02 | 2.3948e-02 | u1(t-4)*u2(t-1)     | -1.3743e-04 | 1.0139e-02 | u5(t-3)*u5(t-5)  | 9.8188e-03  | 1.9145e-03 |
|                          | u1(t-5)*u5(t-1)   | -1.0481e-02 | 9.7260e-02 | u2(t-1)*u3(t-2)     | 7.8525e-06  | 8.5499e-03 | u3(t-3)*u10(t-3) | -2.7523e-04 | 7.3569e-04 |
| $\Sigma$ ERR             | 5                 |             | 99.97      | 8                   |             | 100.00     | 7                |             | 9.9998e+01 |
| Central African Republic | u2(t-3)*u5(t-5)   | 5.4971e-05  | 9.8197e+01 | u4(t-3)*u7(t-5)     | 2.8003e-03  | 9.9213e+01 | u3(t-3)          | 4.2299e-02  | 9.9433e+01 |
|                          | const             | 2.2646e+01  | 6.0034e-01 | u4(t-2)*u7(t-2)     | 1.2489e-03  | 5.1751e-01 | u3(t-5)*u10(t-2) | 3.5027e-3   | 4.9540e-01 |
|                          | u7(t-3)*u7(t-3)   | 5.9026e-06  | 7.5433e-01 | u6(t-2)*u6(t-5)     | 2.1545e+00  | 1.0006e-01 | u4(t-5)*u5(t-4)  | -1.2155e-01 | 4.4790e-02 |
|                          | u2(t-3)*u3(t-4)   | -1.6084e-05 | 2.5292e-01 | u4(t-4)*u7(t-3)     | 2.4325e-03  | 5.1655e-02 | u6(t-1)*u6(t-1)  | 1.7555e+000 | 1.4104e-02 |
|                          | u7(t-1)*u7(t-5)   | 2.7606e-06  | 7.7980e-02 | u4(t-1)*u7(t-1)     | 2.4421e-03  | 5.8276e-02 |                  |             |            |
| $\Sigma$ ERR             | 7                 |             | 99.88      | 5                   |             | 99.94      | 4                |             | 99.99      |

|                                     |                 |             |              |                   |             |               |                  |             |               |
|-------------------------------------|-----------------|-------------|--------------|-------------------|-------------|---------------|------------------|-------------|---------------|
| <b>Democratic Republic of Congo</b> | u5(t-5)         | 4.8274e+00  | 9.9522e+01   | u5(t- 5)          | 4.4867e+00  | 9.9970e+01    | u10(t-1)         | 4.9930e+00  | 9.9974e+01    |
|                                     | u1(t-5)*u3(t-5) | -8.7576e-05 | 2.4581e-01   | u7(t-1)*u9(t-1)   | 4.7709e-04  | 1.7973e-02    | u8(t-2)*u10(t-2) | 1.2688e+00  | 1.3823e-02    |
|                                     | u2(t-3)         | 4.8971e-03  | 9.7493e-02   | u3(t-5)*u5(t-5)   | -4.5999e-04 | 5.9739e-03    | u5(t-5)*u8(t-4)  | 1.5660e-01  | 6.5958e-03    |
|                                     | u2(t-3)*u4(t-4) | -7.1087e-04 | 7.2746e-02   | u4(t-4)*u9(t-5)   | 1.2136e-02  | 2.2449e-03    |                  |             |               |
|                                     | u3(t-5)*u4(t-5) | 9.1103e-04  | 1.3922e-02   | u2(t-5)*u4(t-3)   | -1.8143e-04 | 7.9870e-04    |                  |             |               |
| <b>Σ ERR</b>                        | 6               |             | <b>99.95</b> | 7                 |             | <b>100.00</b> | 3                |             | <b>100.00</b> |
| <b>Zambia</b>                       | u2(t-1)         | 6.2913e-02  | 9.8103e+01   | u4(t- 1)          | -5.1740e+00 | 9.8870e+01    | u7(t-4)*u10(t-3) | 4.6972e-03  | 9.9569e+01    |
|                                     | u2(t-1)*u2(t-1) | -2.0965e-05 | 4.4873e-01   | const             | 3.6270e+01  | 1.0843e+00    | u2(t-5)*u7(t-3)  | 4.7500e-05  | 2.9733e-01    |
|                                     | u1(t-2)*u3(t-1) | -3.1645e-05 | 7.8362e-01   | u1(t- 2)*u1(t- 4) | -2.6255e-04 | 3.9707e-02    | u7(t-2)*u10(t-5) | 4.1847e-03  | 9.0336e-02    |
|                                     | u2(t-1)*u4(t-1) | -6.7343e-03 | 3.3520e-01   | u3(t- 3)*u9(t- 1) | -4.0944e-05 | 4.1271e-03    | u2(t-3)*u6(t-2)  | 6.2646e-04  | 2.0721e-02    |
|                                     | u9(t-2)*u9(t-3) | -6.6148e-04 | 1.6732e-01   | u2(t- 3)*u2(t- 4) | -4.7426e-07 | 1.3551e-03    |                  |             |               |
| <b>Σ ERR</b>                        | 6               |             | <b>99.84</b> | 5                 |             | <b>100.00</b> | 4                |             | <b>99.98</b>  |
| <b>Botswana</b>                     | u2(t-5)*u5(t-4) | 3.4427e-04  | 9.4384e+01   | u5(t- 1)          | 2.2568e-01  | 9.9043e+01    | u4(t-5)*u10(t-3) | 5.4863e-01  | 9.8557e+01    |
|                                     | u2(t-1)         | 2.0403e-03  | 2.9004e+00   | u1(t- 1)*u5(t- 1) | -1.3563e-03 | 9.4740e-01    | u4(t-4)*u10(t-3) | -4.9023e-01 | 7.7043e-01    |
|                                     | u2(t-5)*u4(t-1) | -2.3103e-02 | 6.3684e-01   | u5(t- 1)*u5(t- 5) | -6.7094e-05 | 4.2085e-03    | u1(t-5)          | 8.7520e-02  | 3.9991e-01    |
|                                     | const           | 7.0739e+00  | 9.6718e-01   |                   |             |               | u7(t-3)*u7(t-4)  | 1.5260e-05  | 1.6031e-01    |
|                                     | u2(t-5)*u4(t-2) | 1.4657e-02  | 3.8544e-01   |                   |             |               | u9(t-5)* u9(t-5) | -2.7661e-04 | 4.7933e-02    |
| <b>Σ ERR</b>                        | 7               |             | <b>99.27</b> | 3                 |             | <b>100.00</b> | 7                |             | <b>99.94</b>  |
| <b>South Africa</b>                 | u7(t-2)*u9(t-2) | 3.7608e-03  | 9.6551e+01   | u2(t- 4)*u4(t-3)  | 2.6705e-03  | 9.9118e+01    | u1(t-5)          | 2.2798e-01  | 9.8583e+01    |
|                                     | u2(t-5)*u3(t-1) | 1.2042e-05  | 1.3668e+00   | u4(t- 1)*u7(t- 1) | 2.2403e-01  | 3.9667e-01    | u8(t-3)*u10(t-3) | 2.9471e-01  | 1.2224e+00    |
|                                     | u2(t-5)*u3(t-5) | -1.1012e-05 | 8.9313e-01   | u4(t- 5)*u5(t- 2) | 7.3904e-01  | 3.3821e-01    | u5(t5) *u9(t-5)  | -5.9039e-02 | 9.7144e-02    |
|                                     | u4(t-4)*u9(t-2) | 2.5139e-02  | 4.5757e-01   | u2(t- 1)*u4(t- 3) | -6.0247e-03 | 7.8553e-02    | u6(t-1)*u6(t-1)  | 2.7333e+00  | 5.3400e-02    |
|                                     |                 |             |              | u4(t- 3)*u5(t- 3) | 3.6248e-01  | 4.0454e-02    |                  |             |               |

|             |          |              |          |              |          |              |
|-------------|----------|--------------|----------|--------------|----------|--------------|
| <b>ΣERR</b> | <b>4</b> | <b>99.27</b> | <b>7</b> | <b>99.97</b> | <b>4</b> | <b>99.96</b> |
|-------------|----------|--------------|----------|--------------|----------|--------------|

**Table S3** Death rate models for the W-E transect, showing up to the 5 most important terms for both the whole period model (left) and the split period model (right). Each model shows the term (left), multiplier (middle) and ERR contribution (right). Note that the Chad models are identical in Tables S2 and S3, but included here for completeness. The  $\Sigma$ ERR row shows the number of terms in the complete model (left) and the total ERR value for the full model (right)

| Whole period |                 |             |            | Split period    |             |            |                  |             |            |
|--------------|-----------------|-------------|------------|-----------------|-------------|------------|------------------|-------------|------------|
| Country      | 1960-2014       |             |            | 1960-1989       |             |            | 1990-2014        |             |            |
| Mauritania   | u5(t-5)         | 2.0166e-01  | 9.9553e+01 | u5(t-5)         | 7.6616e-01  | 9.9402e+01 | u5(t-1)*u5(t-3)  | 4.5966e-03  | 9.9949e+01 |
|              | u5(t-1)         | 9.9196e-02  | 1.8943e-01 | u1(t-5)*u5(t-5) | -5.3555e-03 | 4.3782e-01 | u5(t-2)          | 6.3472e-02  | 3.6204e-02 |
|              | u6(t-3)*u7(t-1) | -3.4846e-02 | 1.0284e-01 | u1(t-5)*u3(t-5) | 3.5333e-05  | 1.4791e-01 | u5(t-5)          | 6.7079e-02  | 5.4723e-03 |
|              | u5(t-5)*u8(t-1) | -3.4322e-02 | 4.9261e-02 | u2(t-2)*u7(t-5) | -4.5519e-04 | 5.1726e-03 | u7(t-3)*u8(t-4)  | 2.2736e-02  | 4.4196e-03 |
|              | u3(t-4)*u7(t-1) | 6.4045e-05  | 2.9685e-02 | u4(t-1)*u5(t-5) | -6.6503e-02 | 2.8757e-03 |                  |             |            |
| $\Sigma$ ERR | 5               |             | 99.92      | 5               |             | 100.00     | 4                |             | 100.00     |
| Mali         | u4(t-5)*u7(t-5) | 1.5447e-01  | 9.4668e+01 | u8(t-5)         | 3.4094e+01  | 9.6886e+01 | u10(t-3)         | 7.4847e+00  | 9.9739e+01 |
|              | u6(t-1)*u9(t-2) | -7.8914e-02 | 1.8379e+00 | u4(t-1)*u7(t-4) | 1.0642e-01  | 2.0274e+00 | u4(t-1)*u7(t-5)  | 2.0120e-01  | 7.0201e-02 |
|              | u7(t-2)*u9(t-5) | 5.9449e-03  | 1.3744e+00 | u8(t-5)*u9(t-1) | -4.6794e-01 | 6.4358e-01 | u4(t-4)*u7(t-5)  | -2.0761e-01 | 1.5647e-01 |
|              | u6(t-4)*u6(t-4) | 6.6693e+00  | 4.1077e-01 | u5(t-1)*u5(t-2) | 3.8908e-01  | 2.7764e-01 | u8(t-4)*u10(t-5) | 6.3558e-01  | 2.0589e-02 |
|              | u2(t-2)*u9(t-1) | -1.8538e-04 | 3.8203e-01 | u2(t-4)*u4(t-4) | -1.3733e-02 | 6.5195e-02 | u6(t-2)*u8(t-5)  | 2.3485e-01  | 4.5730e-03 |
| $\Sigma$ ERR | 8               |             | 98.67      | 8               |             | 99.90      | 5                |             | 99.99      |
| Niger        | u3(t-5)         | 1.0888e-01  | 9.8522e+01 | u4(t-2)         | 2.1229e+01  | 9.9679e+01 | u3(t-5)*u3(t-5)  | 6.8784e-05  | 9.7824e+01 |
|              | u3(t-5)*u5(t-5) | -3.2317e-03 | 1.0512e+00 | u3(t-5)*u4(t-2) | 1.9828e-03  | 2.8390e-01 | u1(t-5)*u1(t-5)  | -5.0434e-04 | 1.7557e+00 |
|              | u1(t-1)*u1(t-2) | -4.7125e-04 | 1.9519e-01 | u8(t-1)*u8(t-4) | -1.168e+00  | 2.3150e-02 | u3(t-2)*u3(t-3)  | 2.2366e-04  | 2.7193e-01 |
|              | u3(t-5)*u3(t-5) | -5.5153e-05 | 1.2235e-01 | u4(t-1)*u4(t-3) | -4.1876e+00 | 1.0003e-02 | u2(t-3)*u10(t-3) | -3.0850e-02 | 9.0514e-02 |
|              |                 |             |            |                 |             |            | u6(t-3)*u6(t-4)  | 2.1380e+00  | 2.3523e-02 |

| $\Sigma$ ERR | 4               |             |            | 99.89           |             |            | 4                |             |            | 100.00 |  |  | 5 |  |  | 99.97  |  |  |
|--------------|-----------------|-------------|------------|-----------------|-------------|------------|------------------|-------------|------------|--------|--|--|---|--|--|--------|--|--|
| Chad         | u5(t-5)         | 2.1993e+00  | 9.9312e+01 | u4(t-5)*u5(t-4) | 4.4731e-01  | 9.9858e+01 | u5(t-1)          | 2.8947e+00  | 9.9673e+01 |        |  |  |   |  |  |        |  |  |
|              | u5(t-5)*u8(t-5) | 1.1854e-01  | 3.2136e-01 | u4(t-2)*u5(t-2) | 3.4934e-01  | 8.0844e-02 | u1(t-1)*u5(t-1)  | -1.9186e-02 | 1.5936e-01 |        |  |  |   |  |  |        |  |  |
|              | u5(t- 1)        | 8.8321e-01  | 2.1784e-01 | u1(t-1)*u3(t-5) | 2.0921e-04  | 3.7795e-02 | u1(t-1)*u10(t-5) | 1.9594e-02  | 1.6294e-01 |        |  |  |   |  |  |        |  |  |
|              | u5(t-5)*u5(t-5) | -6.9804e-02 | 2.3948e-02 | u1(t-4)*u2(t-1) | -1.3743e-04 | 1.0139e-02 | u5(t-3)*u5(t-5)  | 9.8188e-03  | 1.9145e-03 |        |  |  |   |  |  |        |  |  |
|              | u1(t-5)*u5(t-1) | -1.0481e-02 | 9.7260e-02 | u2(t-1)*u3(t-2) | 7.8525e-06  | 8.5499e-03 | u3(t-3)*u10(t-3) | -2.7523e-04 | 7.3569e-04 |        |  |  |   |  |  |        |  |  |
| $\Sigma$ ERR | 5               |             |            | 99.97           |             |            | 8                |             |            | 100.00 |  |  | 7 |  |  | 100.00 |  |  |
| Sudan        | u4(t-1)*u5(t-4) | 3.7455e-01  | 9.7534e+01 | u5(t-4)         | 7.3190e+00  | 9.9195e+01 | u4(t-5)*u5(t-1)  | 7.6883e-01  | 9.8567e+01 |        |  |  |   |  |  |        |  |  |
|              | u4(t-5)*u7(t-1) | 4.5238e-03  | 1.6219e+00 | u5(t-4)*u8(t-4) | -2.0442e+00 | 7.3528e-01 | u4(t-1)*u5(t-1)  | 1.1435e+00  | 1.1248e+00 |        |  |  |   |  |  |        |  |  |
|              | const           | 1.1772e+01  | 5.8688e-01 | u8(t-4)*u8(t-4) | 1.0520e+00  | 3.8802e-02 | u4(t-3)*u5(t-3)  | -7.9844e-01 | 2.3622e-01 |        |  |  |   |  |  |        |  |  |
|              | u1(t-4)*u4(t-1) | -2.5314e-02 | 2.0318e-01 |                 |             |            | u7(t-2)          | 9.8809e-02  | 3.1528e-02 |        |  |  |   |  |  |        |  |  |
|              | u2(t-5)*u4(t-1) | 3.5822e-04  | 2.9619e-02 |                 |             |            | u2(t-3)*u8(t-1)  | -2.6121e-04 | 1.3919e-02 |        |  |  |   |  |  |        |  |  |
| $\Sigma$ ERR | 9               |             |            | 99.98           |             |            | 3                |             |            | 99.97  |  |  | 7 |  |  | 99.97  |  |  |

**Table S4** Life Expectancy models for the N-S transect, showing up to the 5 most important terms for both the whole period model (left) and the split period model (right). Each model shows the term (left), multiplier (middle) and ERR contribution (right). The  $\sum$ ERR row shows the number of terms in the complete model (left) and the total ERR value for the full model (right)

| Whole period             |                   |             |            | Split period    |             |            |                  |             |            |
|--------------------------|-------------------|-------------|------------|-----------------|-------------|------------|------------------|-------------|------------|
| Country                  | 1960-2014         |             |            | 1960-1989       |             |            | 1990-2014        |             |            |
| Libya*                   | u5(t- 1)          | 7.5249e+00  | 9.9457e+01 | u5(t- 1)        | -1.1622e+00 | 9.9434e+01 |                  |             |            |
|                          | u5(t- 5)          | 2.8726e-01  | 3.1653e-01 | const           | 6.2513e+01  | 4.3081e-01 |                  |             |            |
|                          | u5(t- 1)*u5(t- 1) | -2.0915e-01 | 8.4889e-02 | u1(t-1)*u4(t-5) | 9.7933e-02  | 9.7933e-02 | No               | Model       |            |
|                          | u4(t- 1)*u4(t- 1) | -5.1641e-01 | 1.2845e-01 | u3(t-5)*u6(t-3) | 1.5211e-04  | 1.5211e-04 |                  |             |            |
| $\sum$ ERR               | 4                 |             | 99.99      | 4               |             | 100.00     |                  |             |            |
| Chad                     | u4(t-1)*u5(t-5)   | 1.1588e-01  | 9.7547e+01 | u1(t-4)*u4(t-5) | 1.5810e-01  | 9.9840e+01 | u4(t-5)          | 1.9562e+01  | 9.9655e+01 |
|                          | const             | 4.6096e+01  | 2.2205e+00 | u4(t-1)*u8(t-5) | 3.2364e-01  | 7.4572e-02 | u4(t-4)*u4(t-5)  | -2.2843e+00 | 3.2843e-01 |
|                          | u5(t-3)*u5(t-5)   | -5.8717e-02 | 2.0352e-01 | u2(t-4)*u2(t-5) | -8.7196e-07 | 2.7095e-02 | u4(t-2)*u9(t-1)  | 4.1492e-02  | 8.2365e-03 |
|                          | u9(t-3)           | 8.0982e-02  | 1.9140e-02 | const           | 4.1518e+01  | 4.1769e-02 | u4(t-5)*u10(t-3) | -1.0189e+00 | 5.5850e-03 |
|                          | u4(t-3)*u5(t-4)   | -9.9401e-02 | 2.8816e-03 | u4(t-5)*u5(t-4) | -5.3587e-01 | 1.6190e-02 | u4(t-3)*u9(t-5)  | 1.5068e-02  | 1.1917e-03 |
| $\sum$ ERR               | 6                 |             | 99.99      | 5               |             | 100.00     | 6                |             | 100.00     |
| Central African Republic | u5(t-5)           | 8.8388e-01  | 9.9329e+01 | u5(t-3)*u5(t-5) | 6.7399e-02  | 9.9875e+01 | u3(t-1)          | 3.2672e-02  | 9.9928e+01 |
|                          | u3(t-5)*u4(t-5)   | 2.6241e-02  | 5.1312e-01 | u2(t-1)*u4(t-5) | 2.2092e-03  | 8.6055e-02 | u5(t-5)*u7(t-1)  | 7.4402e-04  | 3.7667e-02 |
|                          | u7(t-2)*u9(t-4)   | 3.5178e-04  | 5.8196e-02 | u1(t-4)*u3(t-5) | 4.1761e-04  | 1.9713e-02 | u3(t-2)*u3(t-4)  | 1.2796e-04  | 1.7094e-02 |
|                          | u3(t-3)*u4(t-1)   | 1.1155e-02  | 4.5972e-02 |                 |             |            | u3(t-3)          | 3.8662e-02  | 7.4308e-03 |
|                          | u3(t-5)*u4(t-4)   | -1.6779e-02 | 1.2807e-02 |                 |             |            | u6(t-2)*u6(t-3)  | 3.4858e+00  | 3.6841e-03 |

| $\Sigma$ ERR                        |                   |             |            |                 |             |            |                   |             |            |
|-------------------------------------|-------------------|-------------|------------|-----------------|-------------|------------|-------------------|-------------|------------|
| 5                                   |                   |             |            | 3               |             | 99.98      |                   | 8           |            |
| 99.96                               |                   |             |            |                 |             |            |                   | 99.99       |            |
| <b>Democratic Republic of Congo</b> | u9(t-1)           | 5.1360e-01  | 9.9646e+01 | u4(t-5)*u9(t-2) | 3.2474e-02  | 9.9933e+01 | u8(t-1)*u8(t-4)   | -1.7480e-02 | 9.9651e+01 |
|                                     | u5(t-5)*u8(t-5)   | -3.2902e+00 | 2.2918e-01 | u9(t-1)         | 2.4492e-01  | 4.5943e-02 | u8(t-4)*u10(t-2)  | -1.6750e-01 | 2.9248e-01 |
|                                     | u2(t-4)*u9(t-5)   | 8.0873e-05  | 2.7519e-02 | u1(t-5)*u3(t-4) | 7.8433e-05  | 9.2671e-03 | const             | 6.1815e+01  | 4.1687e-02 |
|                                     | u1(t-5)*u2(t-5)   | 5.1613e-05  | 2.1893e-02 |                 | 6.2764e-02  | 5.7988e-03 | u10(t-1)*u10(t-2) | -4.4763e+00 | 1.4058e-02 |
|                                     | u6(t-4)*u6(t-5)   | -3.2515e+00 | 1.0030e-02 |                 |             |            | u8(t-5)*u9(t-2)   | 9.9737e-03  | 4.1346e-04 |
| $\Sigma$ ERR                        |                   |             |            | 4               |             | 99.99      |                   | 5           |            |
| 10                                  |                   |             |            |                 |             |            |                   | 100.00      |            |
| <b>Zambia</b>                       | u4(t-1)           | 6.1779e+00  | 9.9125e+01 | u4(t-1)         | 1.0318e+01  | 9.9984e+01 | u3(t-3)*u10(t-5)  | 4.1044e-03  | 9.9912e+01 |
|                                     | u3(t-1)*u9(t-3)   | 3.4637e-04  | 8.1128e-01 | u2(t-3)*u7(t-2) | 3.8746e-06  | 1.2768e-02 | u9(t-5)*u10(t-5)  | 1.2173e-02  | 6.3679e-02 |
|                                     | u7(t-5)           | 3.1691e-02  | 2.5027e-02 | u4(t-5)         | 3.6772e+00  | 1.3435e-03 | u5(t-3)*u5(t-3)   | -4.0990e-02 | 9.8770e-03 |
|                                     | u4(t-4)           | 3.3044e+00  | 1.0055e-02 | u3(t-3)*u7(t-4) | 6.8657e-06  | 1.8076e-03 |                   |             |            |
|                                     | u2(t-5)*u8(t-5)   | -2.1667e-03 | 7.1083e-03 | u3(t-4)*u7(t-1) | 5.0788e-06  | 4.1457e-04 |                   |             |            |
| $\Sigma$ ERR                        |                   |             |            | 5               |             | 100.00     |                   | 3           |            |
| 6                                   |                   |             |            |                 |             |            |                   | 99.99       |            |
| <b>Botswana</b>                     | u9(t-1)           | 5.4473e-01  | 9.8374e+01 | u1(t-1)         | 1.5441e-01  | 9.9466e+01 | u3(t-3)*u5(t-3)   | 1.4659e-04  | 9.9622e+01 |
|                                     | u4(t-1)           | 2.1432e+01  | 1.2099e+00 | const           | 5.6050e+01  | 3.5191e-01 | u3(t-2)*u5(t-2)   | 1.1115e-04  | 1.2881e-01 |
|                                     | u4(t-2)*u9(t-1)   | -1.6429e-01 | 1.7969e-01 | u5(t-1)         | -1.3465e-01 | 1.7964e-01 | u9(t-2)*u9(t-3)   | -2.8397e-03 | 8.1336e-02 |
|                                     | u5(t-4)*u5(t-5)   | -1.0814e-03 | 1.3746e-01 | u4(t-1)*u4(t-5) | 2.4202e-01  | 2.1682e-03 | u9(t-2)*u10(t-2)  | -7.0998e-03 | 7.9115e-02 |
|                                     | u2(t-1)*u2(t-5)   | -1.1499e-05 | 2.8801e-02 |                 |             |            | u3(t-5)*u5(t-2)   | 1.2277e-04  | 5.8261e-02 |
| $\Sigma$ ERR                        |                   |             |            | 4               |             | 100.00     |                   | 8           |            |
| 7                                   |                   |             |            |                 |             |            |                   | 99.97       |            |
| <b>South Africa</b>                 | u3(t- 5)          | 1.3770e-02  | 9.9361e+01 | u3(t-1)*u4(t-3) | -7.0222e-06 | 9.9764e+01 | u5(t-5)           | 2.4561e+01  | 9.9545e+01 |
|                                     | u3(t- 1)*u3(t- 5) | -1.8612e-06 | 4.4368e-01 | const           | 4.0731e+01  | 1.6457e-01 | u3(t-4)*u8(t-3)   | 9.8477e-03  | 2.7970e-01 |
|                                     | u4(t- 5)*u6(t- 1) | -1.4382e+00 | 6.3292e-02 | u9(t-1)*u9(t-3) | 1.6966e-03  | 6.8803e-02 | u1(t-5)*u8(t-3)   | -6.3619e-01 | 1.5928e-01 |

|             |                    |            |              |                 |            |               |                 |             |               |
|-------------|--------------------|------------|--------------|-----------------|------------|---------------|-----------------|-------------|---------------|
|             | u3(t- 2)           | 4.7451e-03 | 2.9605e-02   | u3(t-3)*u9(t-2) | 1.6339e-05 | 1.4907e-03    | u8(t-3)*u9(t-5) | 1.2609e-01  | 7.6652e-03    |
|             | u8(t- 4)* u9(t- 5) | 1.6482e-01 | 3.8640e-02   | u4(t-3)*u9(t-4) | 2.4342e-02 | 5.5039e-04    | u6(t-2)*u8(t-1) | -1.5520e+00 | 3.8763e-03    |
| <b>ΣERR</b> | <b>4</b>           |            | <b>99.94</b> | <b>5</b>        |            | <b>100.00</b> | <b>7</b>        |             | <b>100.00</b> |



**Table S5** Life Expectancy models for the W-E transect, showing up to the 5 most important terms for both the whole period model (left) and the split period model (right). Each model shows the term (left), multiplier (middle) and ERR contribution (right). Note that the Chad models are identical in Tables S4 and S5, but included here for completeness. The  $\Sigma$ ERR row shows the number of terms in the complete model (left) and the total ERR value for the full model (right)

| Whole period |                 |             |            | Split period    |             |            |                  |             |            |
|--------------|-----------------|-------------|------------|-----------------|-------------|------------|------------------|-------------|------------|
| Country      | 1960-2014       |             |            | 1960-1989       |             |            | 1990-2014        |             |            |
| Mauritania   | u4(t-5)         | 7.2039e+00  | 9.9228e+01 | u4(t-5)         | 3.3989e+01  | 9.9554e+01 | u3(t-2)*u4(t-1)  | -1.8054e-03 | 9.9882e+01 |
|              | u4(t-5)*u5(t-5) | -2.8952e-01 | 5.9900e-01 | u4(t-3)*u4(t-3) | -5.6884e+00 | 4.3597e-01 | const            | 6.1942e+01  | 9.5452e-02 |
|              | Const           | 5.1985e+01  | 1.1492e-01 | u1(t-3)*u9(t-2) | 5.3920e-03  | 3.5767e-03 | u1(t-1)*u3(t-2)  | 4.6016e-05  | 2.2070e-02 |
|              | u1(t-5)*u5(t-5) | 8.6644e-03  | 4.9279e-02 | u5(t-3)*u9(t-2) | -7.7813e-03 | 3.6062e-03 | u1(t-2)*u3(t-4)  | 2.2543e-05  | 3.6960e-04 |
|              | u1(t-5)*u1(t-5) | -1.1951e-03 | 5.5459e-03 | u5(t-1)*u5(t-3) | 1.9969e-03  | 2.2567e-03 | u5(t-1)*u5(t-4)  | -2.0211e-03 | 9.3860e-05 |
| $\Sigma$ ERR | 7               |             | 100.00     | 6               |             | 100.00     | 5                |             | 100.00     |
| Mali         | u3(t-4)         | 6.2350e-02  | 9.9640e+01 | u3(t-5)         | 2.4187e-02  | 9.9688e+01 | u4(t-2)          | 1.1963e+01  | 9.9922e+01 |
|              | u4(t-5)*u6(t-2) | -5.6590e-01 | 1.2225e-01 | u4(t-4)         | 1.0876e+01  | 2.0428e-01 | u5(t-3)*u10(t-4) | 2.6010e-01  | 6.3584e-02 |
|              | u3(t-1)         | 6.5291e-02  | 6.3027e-02 | u5(t-4)         | 1.3277e+00  | 8.2937e-02 | u5(t-4)          | 1.1142e+00  | 9.5453e-03 |
|              | u1(t-1)*u2(t-1) | -1.9381e-04 | 6.4712e-02 | u5(t-1)         | 9.0166e-01  | 1.7557e-02 |                  | 6.8602e-03  | 1.2466e-03 |
|              | u5(t-5)*u5(t-5) | 1.4819e-01  | 3.4025e-02 |                 |             |            |                  | 3.6377e-03  | 2.2068e-03 |
| $\Sigma$ ERR | 5               |             | 99.92      | 4               |             | 99.99      | 5                |             | 100.00     |
| Niger        | u4(t-1)         | 3.8922e+00  | 9.9704e+01 | u4(t-5)         | 1.2934e+01  | 9.9667e+01 | u4(t-1)*u4(t-1)  | 1.8784e+00  | 9.9947e+01 |
|              | u9(t-5)         | 7.7765e-01  | 1.7604e-01 | u4(t-1)*u8(t-4) | 7.5364e+00  | 3.0054e-01 | u3(t-5)*u9(t-1)  | 6.2190e-04  | 3.8956e-02 |
|              | u4(t-4)*u9(t-5) | -1.8599e-01 | 6.1719e-02 | u3(t-2)*u4(t-5) | -3.2727e-03 | 2.4061e-02 | u3(t-2)*u3(t-4)  | 1.3676e-04  | 9.4628e-03 |
|              | u3(t-1)*u8(t-1) | 8.8582e-03  | 3.5449e-02 | u4(t-2)*u8(t-4) | -6.4527e+00 | 2.2075e-03 | u3(t-3)*u8(t-5)  | 7.5235e-03  | 1.4645e-03 |
|              | u4(t-1)*u4(t-5) | 1.6809e+00  | 6.6172e-03 | u8(t-3)*u8(t-5) | 6.9328e-01  | 2.4051e-03 | u5(t-1)*u5(t-4)  | -5.8268e-02 | 1.7158e-03 |

| $\Sigma$ ERR | 5               |             |            | 99.98  | 5               |             |            | 100.00 | 5                |             |            | 100.00 |
|--------------|-----------------|-------------|------------|--------|-----------------|-------------|------------|--------|------------------|-------------|------------|--------|
| Chad         | u4(t-1)*u5(t-5) | 1.1588e-01  | 9.7547e+01 |        | u1(t-4)*u4(t-5) | 1.5810e-01  | 9.9840e+01 |        | u4(t-5)          | 1.9562e+01  | 9.9655e+01 |        |
|              | const           | 4.6096e+01  | 2.2205e+00 |        | u4(t-1)*u8(t-5) | 3.2364e-01  | 7.4572e-02 |        | u4(t-4)*u4(t-5)  | -2.2843e+00 | 3.2843e-01 |        |
|              | u5(t-3)*u5(t-5) | -5.8717e-02 | 2.0352e-01 |        | u2(t-4)*u2(t-5) | -8.7196e-07 | 2.7095e-02 |        | u4(t-2)*u9(t-1)  | 4.1492e-02  | 8.2365e-03 |        |
|              | u9(t-3)         | 8.0982e-02  | 1.9140e-02 |        | const           | 4.1518e+01  | 4.1769e-02 |        | u4(t-5)*u10(t-3) | -1.0189e+00 | 5.5850e-03 |        |
|              | u4(t-3)*u5(t-4) | -9.9401e-02 | 2.8816e-03 |        | u4(t-5)*u5(t-4) | -5.3587e-01 | 1.6190e-02 |        | u4(t-3)*u9(t-5)  | 1.5068e-02  | 1.1917e-03 |        |
| $\Sigma$ ERR | 6               |             |            | 99.99  | 5               |             |            | 100.00 | 6                |             |            | 100.00 |
| Sudan        | u5(t-1)         | -1.4772e+00 | 9.9169e+01 |        | u4(t-1)         | 2.6003e+01  | 9.9876e+01 |        | u5(t-1)          | 1.5994e+01  | 9.9639e+01 |        |
|              | const           | 5.4603e+01  | 5.9113e-01 |        | u4(t-1)*u4(t-1) | -3.1562e+00 | 1.0561e-01 |        | u2(t-2)*u2(t-4)  | 4.7599e-05  | 3.1457e-01 |        |
|              | u1(t-1)         | 9.4276e-02  | 2.3041e-01 |        | u9(t-5)         | 1.4875e-01  | 1.4726e-02 |        | u3(t-2)*u4(t-3)  | 4.4217e-03  | 3.1216e-02 |        |
|              | u7(t-5)*u9(t-1) | -7.3288e-04 | 6.3095e-03 |        | u3(t-2)*u9(t-2) | -1.2706e-04 | 2.5821e-03 |        | u8(t-4)          | 4.6230e-01  | 5.8460e-03 |        |
|              | u3(t-1)*u3(t-2) | 3.7852e-06  | 1.5172e-03 |        | u7(t-5)*u9(t-1) | -2.3132e-04 | 6.2901e-04 |        | u5(t-1)*u8(t-1)  | -1.3608e-01 | 2.8539e-03 |        |
| $\Sigma$ ERR | 6               |             |            | 100.00 | 5               |             |            | 100.00 | 7                |             |            | 99.99  |
